# Supplementary material
Source: HighWire-hosted journal article supplement (https://bmjopen.bmj.com/content/10/10/e040129)
Supplement: inline-supplementary-material-2 [file inline-supplementary-material-2.pdf]

**Table S1. Search strategy used for one of the databases**

| Medline/PubMed          |                                                                                                                |                             |           |
|-------------------------|----------------------------------------------------------------------------------------------------------------|-----------------------------|-----------|
| Search terms            |                                                                                                                |                             |           |
| Group                   | Non-MeSH terms                                                                                                 | MeSH (sub-terms in MeSH)    | Citations |
| #1                      | Magnitude<br>Epidemiology<br>proportion                                                                        | Prevalence                  |           |
| #2                      | Female                                                                                                         | Male                        |           |
| #3                      | Novel coronavirus<br>Novel coronavirus 2019<br>2019 nCoV<br>Wuhan coronavirus<br>Wuhan pneumonia<br>SARS-CoV-2 | COVID-19                    |           |
| #4                      |                                                                                                                | COVID-19 confirmed patients |           |
| #1 AND #2 AND #3 AND #4 |                                                                                                                |                             |           |

(prevalence OR proportion OR magnitude) AND (Male OR Female) AND (Novel coronavirus OR Novel coronavirus 2019 OR 2019 nCoV OR COVID-19 OR Wuhan coronavirus OR Wuhan pneumonia OR SARS-CoV-2) AND COVID-19 confirmed patients (MeSH term) on PubMed database (Table S1). Thus, the PubMed search combines #1 AND #2 AND #3 AND #4
