# Supplementary material
Source: HighWire-hosted journal article supplement (https://bmjopen.bmj.com/content/10/10/e040129)
Supplement: inline-supplementary-material-3 [file inline-supplementary-material-3.pdf]

**Table S2:** Quality appraisal result of included studies in East Africa, from 2002- 2019. Using Joanna Briggs Institute (JBI) quality appraisal checklist

| Author                  | Quality assessment questions |    |    |    |    |    |    |    |    |     |     | Yes<br>Total | Quality status | Overall appraisal |
|-------------------------|------------------------------|----|----|----|----|----|----|----|----|-----|-----|--------------|----------------|-------------------|
|                         | Q1                           | Q2 | Q3 | Q4 | Q5 | Q6 | Q7 | Q8 | Q9 | Q10 | Q11 |              |                |                   |
| Cross-sectional studies |                              |    |    |    |    |    |    |    |    |     |     |              |                |                   |
| 1. Li K et al           | N                            | Y  | N  | Y  | Y  | N  | Y  | Y  | Y  |     |     | 6/9          | Low risk       | Included          |
| 2. Liu Y et al          | Y                            | Y  | Y  | Y  | Y  | Y  | Y  | Y  | Y  |     |     | 9/9          | Low risk       | Included          |
| 3. Liu Y et al          | Y                            | Y  | UC | Y  | Y  | N  | Y  | Y  | N  |     |     | 6/9          | Low risk       | Included          |
| 4. Liu J et al          | Y                            | Y  | Y  | Y  | Y  | UC | Y  | Y  | Y  |     |     | 8/9          | Low risk       | Included          |
| 5. Wu J et al           | Y                            | Y  | Y  | Y  | Y  | N  | Y  | Y  | Y  |     |     | 8/9          | Low risk       | Included          |
| 6. Xu X et al           | Y                            | UC | Y  | Y  | Y  | N  | Y  | Y  | Y  |     |     | 8/9          | Low risk       | Included          |
| 7. Xu Y et al           | UC                           | Y  | Y  | Y  | Y  | N  | Y  | Y  | N  |     |     | 6/9          | Low risk       | Included          |
| 8. Yao et al            | Y                            | Y  | Y  | Y  | Y  | N  | Y  | Y  | Y  |     |     | 8/9          | Low risk       | Included          |
| 9. Young et al          | N                            | Y  | N  | Y  | Y  | N  | Y  | Y  | Y  |     |     | 6/9          | Low risk       | Included          |
| 10. Zhang J et al       | Y                            | Y  | Y  | Y  | Y  | Y  | Y  | Y  | N  |     |     | 8/9          | Low risk       | Included          |
| 11. Zhang M et al       | Y                            | Y  | UC | Y  | Y  | N  | Y  | Y  | Y  |     |     | 7/9          | Low risk       | Included          |
| 12. Zhao et al          | Y                            | Y  | Y  | Y  | Y  | UC | Y  | Y  | Y  |     |     | 8/9          | Low risk       | Included          |
| 13. Zhu et al           | Y                            | UC | Y  | Y  | Y  | N  | Y  | Y  | Y  |     |     | 7/9          | Low risk       | Included          |
| 14. Yanping Z et al     | Y                            | N  | Y  | Y  | Y  | Y  | Y  | Y  | Y  |     |     | 8/9          | Low risk       | Included          |
| 15. W. Guan et al       | Y                            | UC | Y  | Y  | Y  | N  | Y  | Y  | Y  |     |     | 7/9          | Low risk       | Included          |
| 16. WHO ,2020           | Y                            | UC | Y  | Y  | Y  | N  | Y  | Y  | Y  |     |     | 7/9          | Low risk       | Included          |
| 17. Huang et al         | Y                            | UC | Y  | Y  | Y  | Y  | Y  | Y  | N  |     |     | 7/9          | Low risk       | Included          |
| 18. Chen et al          | UC                           | Y  | Y  | Y  | Y  | N  | Y  | Y  | Y  |     |     | 6/9          | Low risk       | Included          |
| 19. Wang et al          | Y                            | Y  | Y  | Y  | Y  | N  | Y  | Y  | N  |     |     | 7/9          | Low risk       | Included          |
| 20. Kaiyuan S et al     | N                            | Y  | N  | Y  | Y  | N  | Y  | Y  | Y  |     |     | 6/9          | Low risk       | Included          |
| 21. AL Giwa et al       | Y                            | Y  | Y  | Y  | Y  | Y  | Y  | Y  | Y  |     |     | 9/9          | Low risk       | Included          |
| 22. Qian G et al        | Y                            | Y  | UC | Y  | Y  | N  | Y  | Y  | Y  |     |     | 8/9          | Low risk       | Included          |
| 23. Livingston E et al  | Y                            | Y  | Y  | Y  | Y  | UC | Y  | Y  | N  |     |     | 7/9          | Low risk       | Included          |
| 24. Wang Y et al        | N                            | Y  | N  | Y  | Y  | N  | Y  | Y  | Y  |     |     | 6/9          | Low risk       | Included          |
| 25. KSID,2020           | Y                            | Y  | Y  | Y  | Y  | Y  | Y  | Y  | Y  |     |     | 9/9          | Low risk       | Included          |
| 26. Su YJ et al         | Y                            | Y  | UC | Y  | Y  | N  | Y  | Y  | N  |     |     | 6/9          | Low risk       | Included          |
| 27. Jennifer B et al    | Y                            | Y  | Y  | Y  | Y  | UC | Y  | Y  | Y  |     |     | 8/9          | Low risk       | Included          |
| 28. Kui et al           | Y                            | Y  | Y  | Y  | Y  | N  | Y  | Y  | Y  |     |     | 8/9          | Low risk       | Included          |
| 29. Deng L et al        | Y                            | UC | Y  | Y  | Y  | N  | Y  | Y  | Y  |     |     | 8/9          | Low risk       | Included          |
| 30. Dong X et al        | UC                           | Y  | Y  | Y  | Y  | N  | Y  | Y  | N  |     |     | 6/9          | Low risk       | Included          |
| 31. Xiaobo et al        | Y                            | Y  | Y  | Y  | Y  | N  | Y  | Y  | Y  |     |     | 8/9          | Low risk       | Included          |
| 32. Zhou F et al        | N                            | Y  | N  | Y  | Y  | N  | Y  | Y  | Y  |     |     | 6/9          | Low risk       | Included          |
| 33. Wu Y et al          | Y                            | Y  | Y  | Y  | Y  | Y  | Y  | Y  | N  |     |     | 8/9          | Low risk       | Included          |
| 34. Gao Q et al         | Y                            | Y  | UC | Y  | Y  | N  | Y  | Y  | Y  |     |     | 7/9          | Low risk       | Included          |
| 35. Chen X et al        | Y                            | Y  | Y  | Y  | Y  | UC | Y  | Y  | Y  |     |     | 8/9          | Low risk       | Included          |
| 36. Zhang G et al       | Y                            | UC | Y  | Y  | Y  | N  | Y  | Y  | Y  |     |     | 7/9          | Low risk       | Included          |
| 37. Wu W et al          | Y                            | N  | Y  | Y  | Y  | Y  | Y  | Y  | Y  |     |     | 8/9          | Low risk       | Included          |
| 38. Cao M et al         | Y                            | UC | Y  | Y  | Y  | N  | Y  | Y  | Y  |     |     | 7/9          | Low risk       | Included          |
| 39. Chung et al         | Y                            | UC | Y  | Y  | Y  | N  | Y  | Y  | Y  |     |     | 7/9          | Low risk       | Included          |

|                      |    |    |    |   |   |    |   |   |   |  |  |     |          |          |
|----------------------|----|----|----|---|---|----|---|---|---|--|--|-----|----------|----------|
| 40. Xiao F et al     | Y  | UC | Y  | Y | Y | Y  | Y | Y | N |  |  | 7/9 | Low risk | Included |
| 41. Qi D et al       | UC | Y  | Y  | Y | Y | N  | Y | Y | Y |  |  | 6/9 | Low risk | Included |
| 42. Liang et al      | Y  | Y  | Y  | Y | Y | N  | Y | Y | N |  |  | 7/9 | Low risk | Included |
| 43. Wang Y et al     | N  | Y  | N  | Y | Y | N  | Y | Y | Y |  |  | 6/9 | Low risk | Included |
| 44. Nicholas E et al | Y  | Y  | Y  | Y | Y | Y  | Y | Y | Y |  |  | 9/9 | Low risk | Included |
| 45. Mizumoto K et al | Y  | Y  | UC | Y | Y | N  | Y | Y | Y |  |  | 8/9 | Low risk | Included |
| 46. Chen X et al     | Y  | Y  | Y  | Y | Y | UC | Y | Y | N |  |  | 7/9 | Low risk | Included |
| 47. Cheng J et al    | N  | Y  | N  | Y | Y | N  | Y | Y | Y |  |  | 6/9 | Low risk | Included |
| 48. Li J et al       | Y  | Y  | Y  | Y | Y | Y  | Y | Y | Y |  |  | 9/9 | Low risk | Included |
| 49. Tian S et al     | Y  | Y  | UC | Y | Y | N  | Y | Y | Y |  |  | 8/9 | Low risk | Included |
| 50. Li et al         | Y  | Y  | Y  | Y | Y | UC | Y | Y | N |  |  | 7/9 | Low risk | Included |
| 51. Liu Y et al      | N  | Y  | N  | Y | Y | N  | Y | Y | Y |  |  | 6/9 | Low risk | Included |
| 52. Cao W et al      | Y  | Y  | Y  | Y | Y | Y  | Y | Y | Y |  |  | 9/9 | Low risk | Included |
| 53. Chaolin et al    | Y  | Y  | UC | Y | Y | N  | Y | Y | N |  |  | 6/9 | Low risk | Included |
| 54. Yang X et al     | Y  | Y  | Y  | Y | Y | UC | Y | Y | Y |  |  | 8/9 | Low risk | Included |
| 55. Liu L et al      | Y  | Y  | Y  | Y | Y | N  | Y | Y | Y |  |  | 8/9 | Low risk | Included |
| 56. Huang C et al    | Y  | UC | Y  | Y | Y | N  | Y | Y | Y |  |  | 8/9 | Low risk | Included |
| 57. Wang D et al     | UC | Y  | Y  | Y | Y | N  | Y | Y | N |  |  | 6/9 | Low risk | Included |
| 58. Cheng J et al    | Y  | Y  | Y  | Y | Y | N  | Y | Y | Y |  |  | 8/9 | Low risk | Included |
| 59. Wu J et al       | N  | Y  | N  | Y | Y | N  | Y | Y | Y |  |  | 6/9 | Low risk | Included |
| 60. Li K et al       | Y  | Y  | Y  | Y | Y | Y  | Y | Y | N |  |  | 8/9 | Low risk | Included |
| 61. Li J et al       | Y  | Y  | UC | Y | Y | N  | Y | Y | Y |  |  | 7/9 | Low risk | Included |
| 62. Guan W et al     | Y  | Y  | Y  | Y | Y | UC | Y | Y | Y |  |  | 8/9 | Low risk | Included |
| 63. Tian S et al     | Y  | UC | Y  | Y | Y | N  | Y | Y | Y |  |  | 7/9 | Low risk | Included |
| 64. Liu Y et al      | Y  | N  | Y  | Y | Y | Y  | Y | Y | Y |  |  | 8/9 | Low risk | Included |
| 65. Xu Y et al       | Y  | UC | Y  | Y | Y | N  | Y | Y | Y |  |  | 7/9 | Low risk | Included |
| 66. Cao W et al      | Y  | UC | Y  | Y | Y | N  | Y | Y | Y |  |  | 7/9 | Low risk | Included |
| 67. Yang X et al     | Y  | UC | Y  | Y | Y | Y  | Y | Y | N |  |  | 7/9 | Low risk | Included |
| 68. Liu L et al      | UC | Y  | Y  | Y | Y | N  | Y | Y | Y |  |  | 6/9 | Low risk | Included |
| 69. Zhang J et al    | Y  | Y  | Y  | Y | Y | N  | Y | Y | N |  |  | 7/9 | Low risk | Included |

Key: Y=yes, N=no, UC=unclear, Q=Question

## JBI Critical Appraisal Checklist for Studies Reporting Prevalence Data

| Criteria                                                                                        | Yes | No | Un clear | Not applicable |
|-------------------------------------------------------------------------------------------------|-----|----|----------|----------------|
| 1. Was the sample frame appropriate to address the target population?                           |     |    |          |                |
| 2. Were study participants sampled in an appropriate way?                                       |     |    |          |                |
| 3. Was the sample size adequate?                                                                |     |    |          |                |
| 4. Were the study subjects and the setting described in detail?                                 |     |    |          |                |
| 5. Was the data analysis conducted with sufficient coverage of the identified sample?           |     |    |          |                |
| 6. Were valid methods used for the identification of the condition?                             |     |    |          |                |
| 7. Was the condition measured in a standard, reliable way for all participants?                 |     |    |          |                |
| 8. Was there appropriate statistical analysis?                                                  |     |    |          |                |
| 9. Was the response rate adequate, and if not, was the low response rate managed appropriately? |     |    |          |                |
