# Supplementary material
Source: HighWire-hosted journal article supplement (https://bmjopen.bmj.com/content/10/10/e040129)
Supplement: inline-supplementary-material-7 [file inline-supplementary-material-7.pdf]

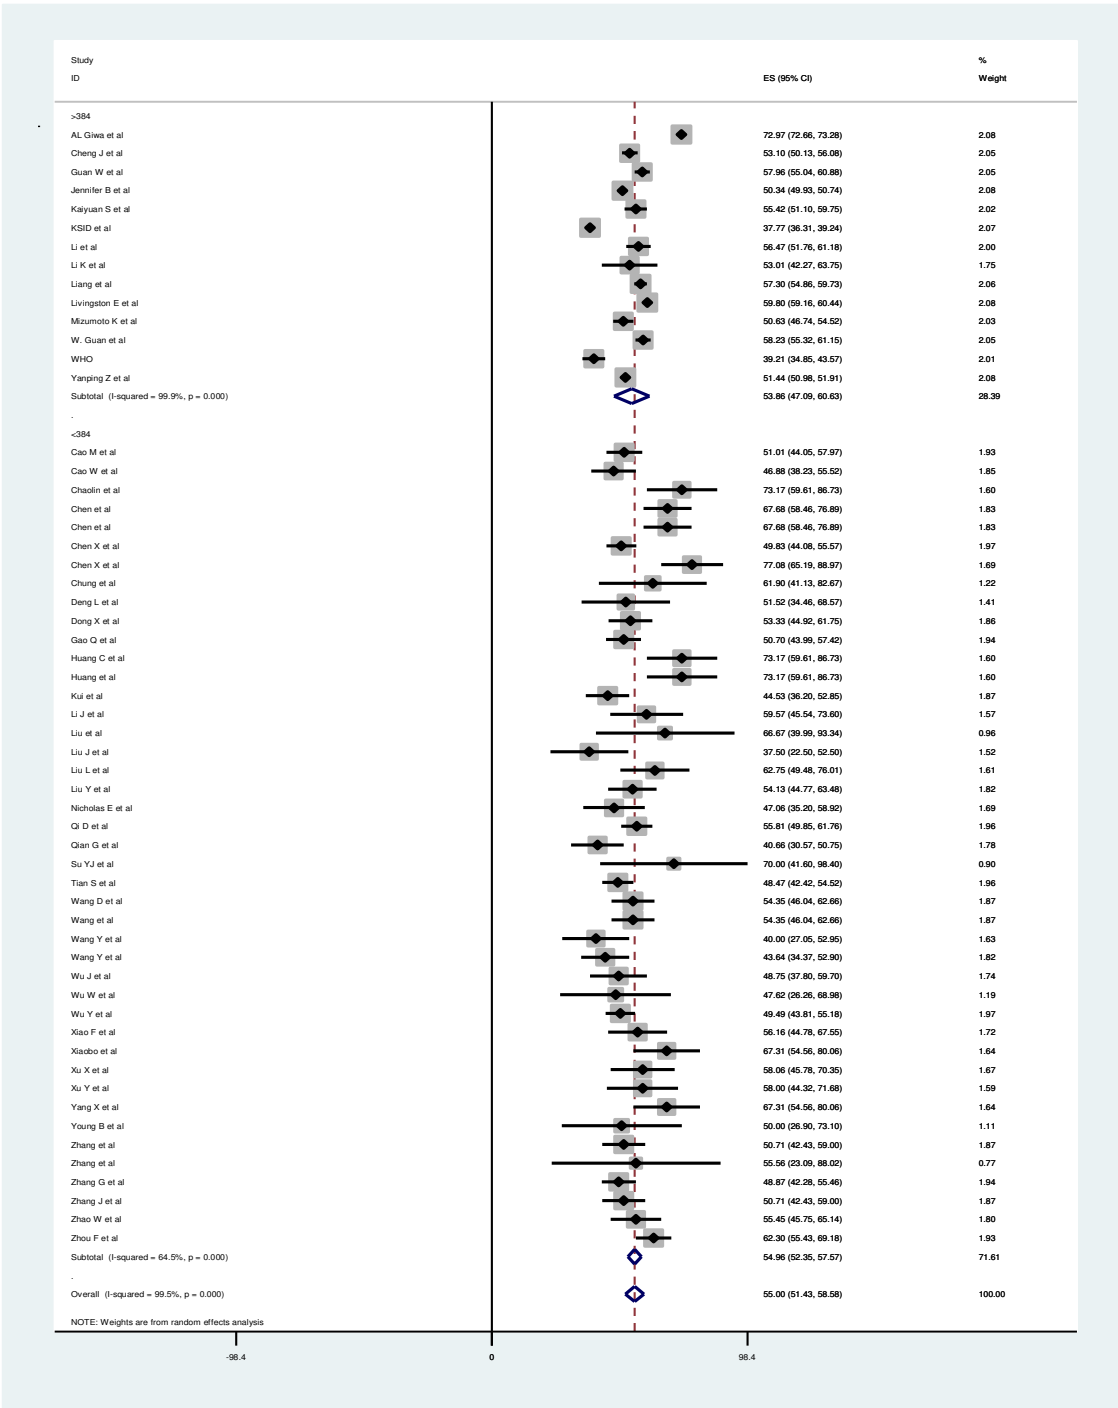

Supplementary Figure 4: Subgroup analysis of the prevalence of COVID-19 by sample size
